# Supplementary material for: Development of Kinematic Graphs of Median Nerve during Active Finger Motion: Implications of Smartphone Use
Source: PLoS One. 2016 Jul 1;11(7):e0158455. doi: 10.1371/journal.pone.0158455 (PMC4930216; doi:10.1371/journal.pone.0158455)
Supplement: S1 Fig — (XLSX) [file pone.0158455.s001.xlsx]

## Sheet: CSA
		Interval 0	Interval 1	Interval 2	Interval 3	Interval 4	Interval 5
		Cross-Sectional Area
T1: Thumb Opposition (Neutral)	Average	8.11195	7.77351	7.42486	7.41772	7.27428	7.04911
	SD	1.10088	1.00961	1.00683	1.00331	1.00283	1.00279
Two successive time points during a single hand activity	F-statistic, p-value	F(1,89)=71.192, p<0.001	F(1,89)=83.457, p<0.001	F(1,89)=4.014, p=0.055	F(1,89)=4.014, p=0.055	F(1,89)=85.939, p<0.001	F(1,89)=85.939, p<0.001
Different hand motions at the same time point: T1 vs T2	F-statistic, p-value	F(1,89)=63.856, p<0.001	F(1,89)=62.554, p<0.001	F(1,89)=24.061, p<0.001	F(1,89)=48.958, p<0.001	F(1,89)=68.135, p<0.001	F(1,89)=55.004, p<0.001
Different hand motions at the same time point: T1 vs T3	F-statistic, p-value	F(1,89)=7.983, p=0.006	F(1,89)=0.178, p=0.674	F(1,89)=8.075, p=0.006	F(1,89)=0.119, p=0.731	F(1,89)=0.000, p=0.989	F(1,89)=0.006, p=0.937
T2: Thumb Opposition (Ulnar)	Average	7.55185	7.22112	7.04973	6.90395	6.69571	6.51514
	SD	0.768484	0.721142	0.664699	0.687667	0.693128	0.700672
Two successive time points during a single hand activity	F-statistic, p-value	F(1,89)=168.337, p<0.001	F(1,89)=32.784, p<0.001	F(1,89)=33.001, p<0.001	F(1,89)=116.756, p<0.001	F(1,89)=90.021, p<0.001	F(1,89)=90.021, p<0.001
Different hand motions at the same time point: T2 vs T1	F-statistic, p-value	F(1,89)=63.856, p<0.001	F(1,89)=62.554, p<0.001	F(1,89)=24.061, p<0.001	F(1,89)=48.958, p<0.001	F(1,89)=68.135, p<0.001	F(1,89)=55.004, p<0.001
Different hand motions at the same time point: T2 vs T3	F-statistic, p-value	F(1,89)=50.394, p<0.001	F(1,89)=66.068, p<0.001	F(1,89)=62.933, p<0.001	F(1,89)=75.090, p<0.001	F(1,89)=97.396, p<0.001	F(1,89)=79.974, p<0.001
T3: Pinch Grip (Neutral)	Average	7.96894	7.75076	7.56728	7.43562	7.27346	7.05411
	SD	0.960449	0.929523	0.903274	0.895887	0.851228	0.866462
Two successive time points during a single hand activity	F-statistic, p-value	F(1,89)=228.648, p<0.001	F(1,89)=115.176, p<0.001	F(1,89)=96.104, p<0.001	F(1,89)=83.706, p<0.001	F(1,89)=196.442, p<0.001	F(1,89)=196.442, p<0.001
Different hand motions at the same time point: T3 vs T1	F-statistic, p-value	F(1,89)=7.983, p=0.006	F(1,89)=0.178, p=0.674	F(1,89)=8.075, p=0.006	F(1,89)=0.119, p=0.731	F(1,89)=0.000, p=0.989	F(1,89)=0.006, p=0.937
Different hand motions at the same time point: T3 vs T2	F-statistic, p-value	F(1,89)=50.394, p<0.001	F(1,89)=66.068, p<0.001	F(1,89)=62.933, p<0.001	F(1,89)=75.090, p<0.001	F(1,89)=97.396, p<0.001	F(1,89)=79.974, p<0.001
Significant differences exist between the same time points of different hand activities and between two successive time points of same hand activity after Bonferroni adjustment (p<0.05) are highlighted.
